# Supplementary material for: MALAT1 sponges miR-26a and miR-26b to regulate endothelial cell angiogenesis via PFKFB3-driven glycolysis in early-onset preeclampsia
Source: PubMed Central journal article supplement — Mol Ther Nucleic Acids. 2021 Jan 16;23:897–907. doi: 10.1016/j.omtn.2021.01.005 (PMC7868745; doi:10.1016/j.omtn.2021.01.005), 2021-01-16
Supplement: mmc1.pdf [file mmc1.pdf]

OMTN, Volume 23

## Supplemental Information

**MALAT1 sponges miR-26a and miR-26b to regulate  
endothelial cell angiogenesis via PFKFB3-driven  
glycolysis in early-onset preeclampsia**

**Qi Li, Xiaoxia Liu, Weifang Liu, Yang Zhang, Mengying Wu, Zhirui Chen, Yin Zhao, and Li  
Zou**

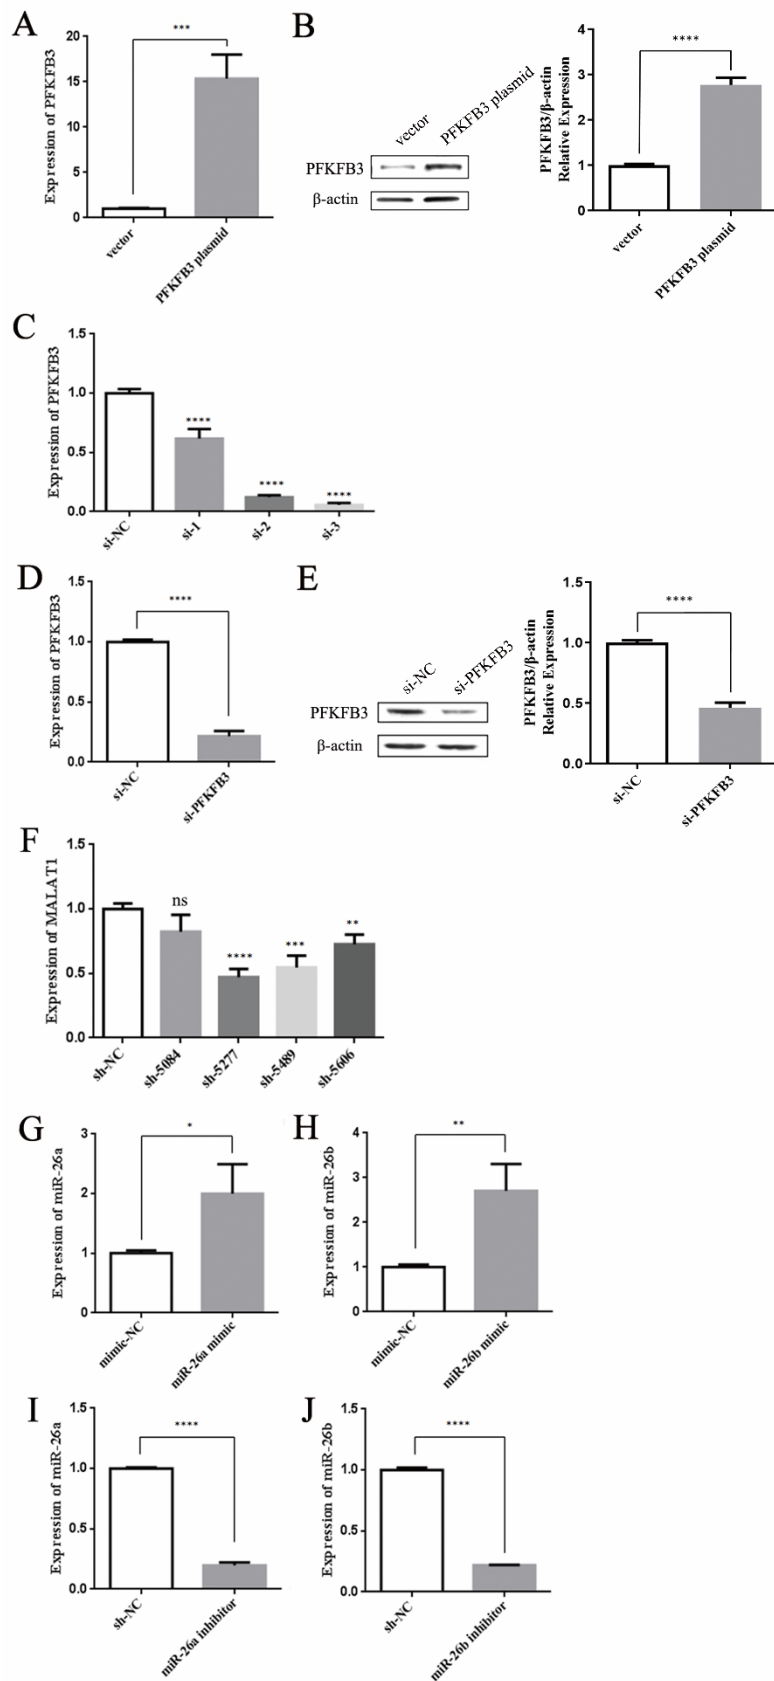

**Figure S1** ECs were transfected with various plasmids and siRNA to effectively up- or downregulate the expression of MALAT1, PFKFB3, miR-26a and miR-26b.

(A, B) The mRNA and protein expression levels of PFKFB3 were measured in ECs after transfection with vector and the PFKFB3 plasmid. (C) The mRNA expression of PFKFB3 was measured in ECs after transfection with si-NC, si-1, si-2 and si-3. (D, E) The mRNA and protein expression levels of PFKFB3 were measured in ECs after transfection with si-NC and si-PFKFB3. (F) The mRNA expression of PFKFB3 was measured in ECs after transfection with sh-NC, sh-5084, sh-5277, sh-5489 and sh-5606. (G, I) The mRNA expression of miR-26a was measured in ECs after transfection with mimic-NC, miR-26a mimic, sh-NC, or miR-26a inhibitor. (H, J) The mRNA expression of miR-26b was measured in ECs after transfection with mimic-NC, miR-26b mimic, sh-NC, or miR-26b inhibitor. The data are presented as the means  $\pm$  SD of three independent experiments. \* P <0.05; \*\* P <0.01; \*\*\* P <0.001; and \*\*\*\* P <0.0001 by one-way ANOVA and Student's t-test. n.s., not significant.

**Table S1.** Primer sequences.

| <b>Amplicon</b>                 | <b>Primer FW (5'–3')</b>  | <b>Primer RV (5'–3')</b>  |
|---------------------------------|---------------------------|---------------------------|
| <i>PFKFB3</i>                   | AGCCCGGATTACAAAGACTG<br>C | GGTAGCTGGCTTCATAGCAA<br>C |
| <i>MALAT1</i>                   | TGGTGTCGAGGTCTTTGGTG      | AAAAGCCCTCTCAGCCACTC      |
| <i><math>\beta</math>-actin</i> | CCTTCCTGGGCATGGAGTC       | TGATCTTCATTGTGCTGGGTG     |

Primers for miR-26a, miR-26b and U6 were purchased from RiboBio and were designed by the stem-loop method.
